# Supplementary material
Source: PubMed Central journal article supplement (PMC8017936)
Supplement: pnas.2005256118.sapp.pdf [file pnas.2005256118.sapp.pdf]

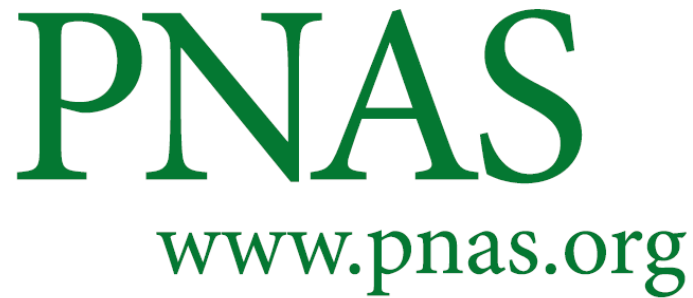

**Supplementary Information for**

**The Arabidopsis GRAS-type SCL28 transcription factor controls the mitotic cell cycle and division plane orientation**

Camila Goldy, José-Antonio Pedroza-García, Natalie Breakfield, Toon Cools, Rodrigo Vena, Philip N. Benfey, Lieven De Veylder, Javier Palatnik, Ramiro E. Rodriguez

**Corresponding author:** Ramiro E. Rodriguez (email: rrodriguez@ibr-conicet.gov.ar)

**This PDF file includes:**

Figures S1 to S9

Tables S1 to S3

**Other supplementary materials for this manuscript include the following:**

Datasets S1 to S5

## Supplementary Figures

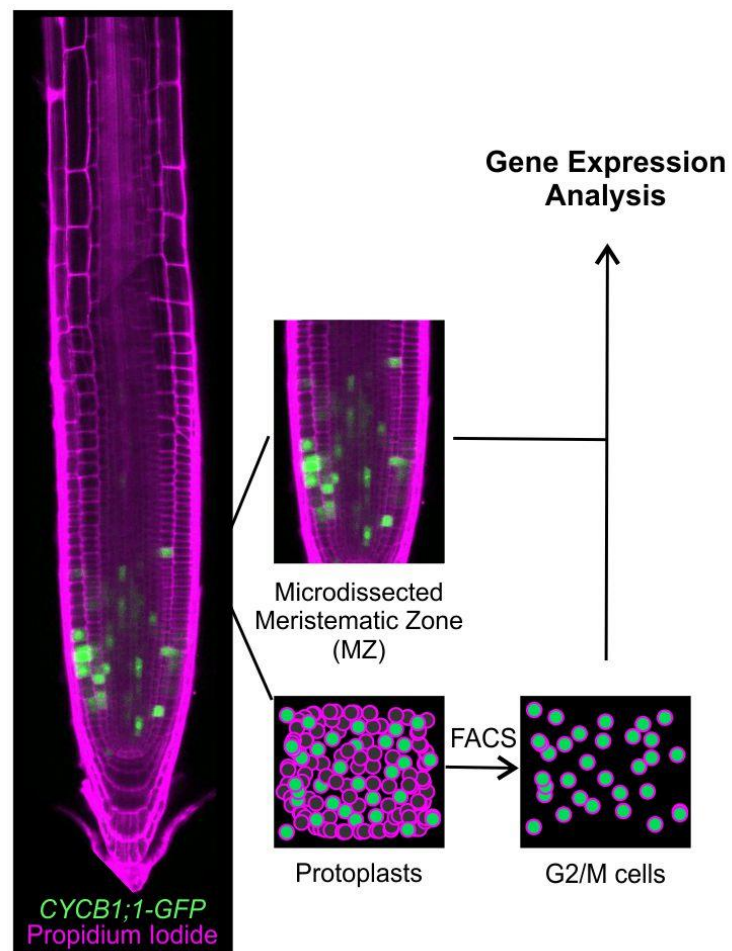

**Figure S1. Schematic representation of the methodology used for the analysis of the transcriptome of cells in G2/M.**

In the left, a LSCM image of the *CYCB1;1-GFP* reporter (fluorescence in green) in 6-day-old wild-type and *sc128-3* roots stained with propidium iodide (PI, fluorescence in magenta).

| GO Term    | Description                                                           | Genes Enriched in G2/M cells (-LOG10(FDR)) | Genes Depleted in G2/M cells (-LOG10(FDR)) |
|------------|-----------------------------------------------------------------------|--------------------------------------------|--------------------------------------------|
| GO:0007017 | microtubule-based process                                             | 6.46                                       |                                            |
| GO:0006396 | RNA processing                                                        | 4.15                                       |                                            |
| GO:0007018 | microtubule-based movement                                            | 3.89                                       |                                            |
| GO:0034660 | ncRNA metabolic process                                               | 3.66                                       |                                            |
| GO:0016072 | rRNA metabolic process                                                | 3.41                                       |                                            |
| GO:0000087 | M phase of mitotic cell cycle                                         | 2.85                                       |                                            |
| GO:0000910 | cytokinesis                                                           | 1.80                                       |                                            |
| GO:0048229 | gametophyte development                                               | 1.77                                       |                                            |
| GO:0006839 | mitochondrial transport                                               | 1.49                                       |                                            |
| GO:0034641 | cellular nitrogen compound metabolic process                          | 1.49                                       |                                            |
| GO:0042542 | response to hydrogen peroxide                                         | 1.44                                       |                                            |
| GO:0007049 | cell cycle                                                            | 14.43                                      | 2.15                                       |
| GO:0006807 | nitrogen compound metabolic process                                   | 4.42                                       | 3.05                                       |
| GO:0009987 | cellular process                                                      | 3.96                                       | 1.32                                       |
| GO:0006139 | nucleobase, nucleoside, nucleotide and nucleic acid metabolic process | 3.57                                       | 3.72                                       |
| GO:0044085 | cellular component biogenesis                                         | 2.09                                       | 1.36                                       |
| GO:0051301 | cell division                                                         | 1.89                                       | 2.05                                       |
| GO:0006259 | DNA metabolic process                                                 | 1.49                                       | 12.22                                      |
| GO:0048509 | regulation of meristem development                                    |                                            | 1.32                                       |
| GO:0009059 | macromolecule biosynthetic process                                    |                                            | 1.33                                       |
| GO:0007167 | enzyme linked receptor protein signaling pathway                      |                                            | 1.41                                       |
| GO:0010556 | regulation of macromolecule biosynthetic process                      |                                            | 1.44                                       |
| GO:0044238 | primary metabolic process                                             |                                            | 1.46                                       |
| GO:0050896 | response to stimulus                                                  |                                            | 1.49                                       |
| GO:0048364 | root development                                                      |                                            | 1.49                                       |
| GO:0008152 | metabolic process                                                     |                                            | 1.49                                       |
| GO:0009725 | response to hormone stimulus                                          |                                            | 1.49                                       |
| GO:0040007 | growth                                                                |                                            | 1.51                                       |
| GO:0048580 | regulation of post-embryonic development                              |                                            | 1.60                                       |
| GO:0048589 | developmental growth                                                  |                                            | 1.60                                       |
| GO:0042545 | cell wall modification                                                |                                            | 1.60                                       |
| GO:0009719 | response to endogenous stimulus                                       |                                            | 1.60                                       |
| GO:0010218 | response to far red light                                             |                                            | 1.64                                       |
| GO:0009058 | biosynthetic process                                                  |                                            | 1.72                                       |
| GO:0006974 | response to DNA damage stimulus                                       |                                            | 1.80                                       |
| GO:0032502 | developmental process                                                 |                                            | 2.41                                       |
| GO:0032501 | multicellular organismal process                                      |                                            | 3.02                                       |
| GO:0065007 | biological regulation                                                 |                                            | 4.43                                       |
| GO:0006323 | DNA packaging                                                         |                                            | 9.92                                       |
| GO:0006260 | DNA replication                                                       |                                            | 19.09                                      |

**Figure S2. GO-term enrichment analysis in the lists of genes enriched or depleted in G2/M cells.**

GO-term enrichment analysis was performed using the list of genes expressed preferentially in the root meristem and enriched or depleted in G2/M cells. The  $-\text{LOG}_{10}(\text{FDR})$  is informed when the False Discovery Rate was less than the 0.01 threshold selected for significantly enriched GO-terms. Terms related to cell proliferation are highlighted in blue, while terms related to processes specific to mitosis and cytokinesis or S-phase are highlighted in green or red, respectively.

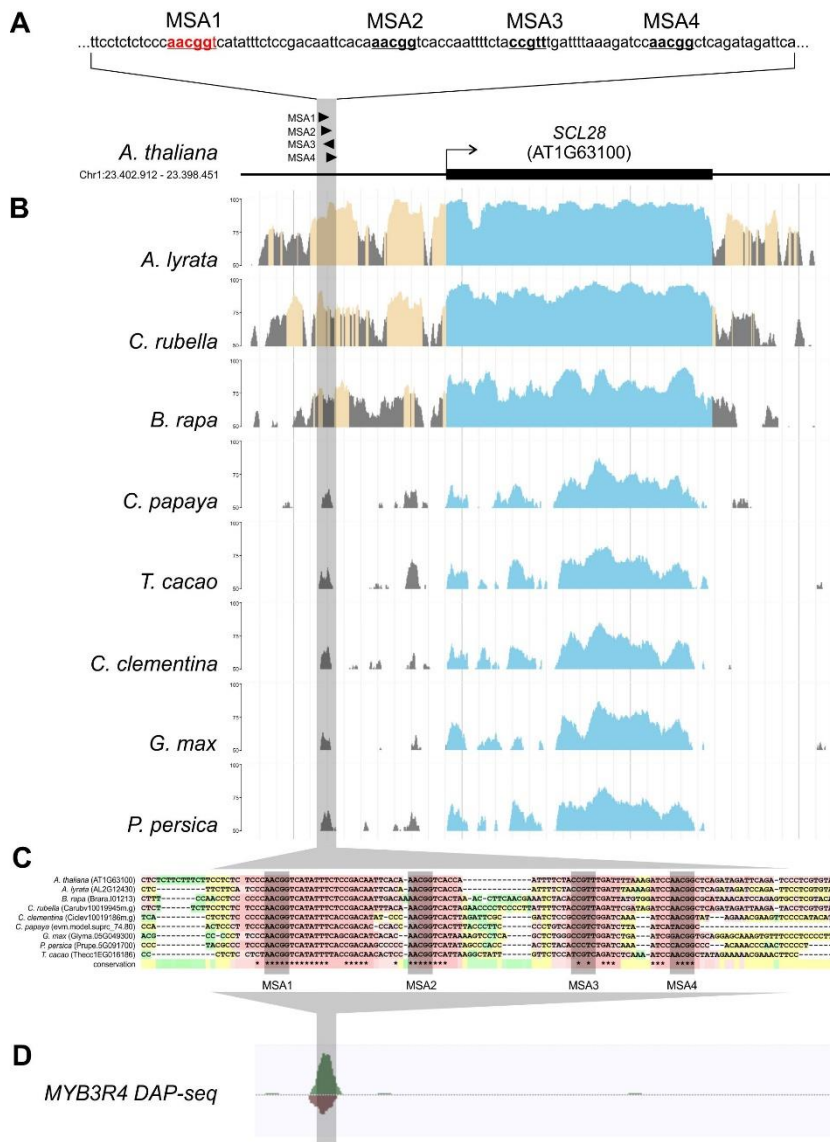

**Figure S3. Mitosis-specific activator (MSA) elements in the SCL28 promoter.**

**A.** Schematic representation of *Arabidopsis thaliana* SCL28 locus indicating the four MSA elements found in the upstream regulatory regions. The core sequence of each MSA element is underlined and the MSA element deleted in the ProSCL28ΔMSA1:SCL28 VENUS construct is highlighted in red.

**B and C.** The MSA elements found in the SCL28 promoter are conserved across plant species. **B.** VISTA plots obtained from the Phytozome V12.1 database with the whole genome alignments between *Arabidopsis thaliana* and other 8 species are shown. Nucleotide identities in 100 bp windows with values higher than 50% are plotted. **C.** Multiple sequence alignment of the conserved promoter region containing the MSA elements highlighted with gray boxes.

**D.** Experimental evidence for the binding of MYB3R4 to the MSA elements found in the promoter of SCL28. “MYB3R4 DAP-Seq” track shows the peaks retrieved from the Plant Cistrome Database derived from DAP-Seq experiments designed to detect *in-vitro* the binding sites of MYB3R4 to the *Arabidopsis thaliana* genome (O’Malley et al. (2016) Cell).

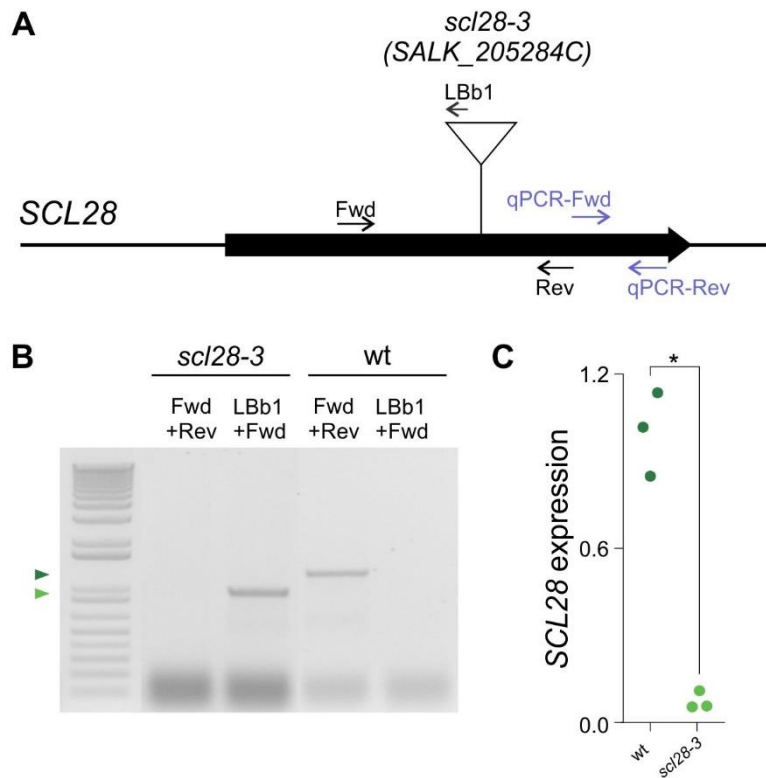

**Figure S4. *scI28-3*, a mutant allele for SCL28.**

**A.** Schematic representation of the *SCL28* locus indicating the T-DNA insertion in *scI28-3* (SALK\_205284) and the oligonucleotide primers used for genotyping and RT-qPCR.

**B.** A representative agarose gel showing the amplification of the mutant (light-green arrowhead) and the wild-type (dark-green arrowhead) alleles of *SCL28* in wild-type and *scI28-3* plants.

**C.** Expression of *SCL28* in wild-type and *scI28-3*. Expression was estimated by RT-qPCR in three biological replicates and normalized to the mean value obtained in wild-type plants. Asterisks indicate significant differences (Student's t test,  $p < 0.05$ ).

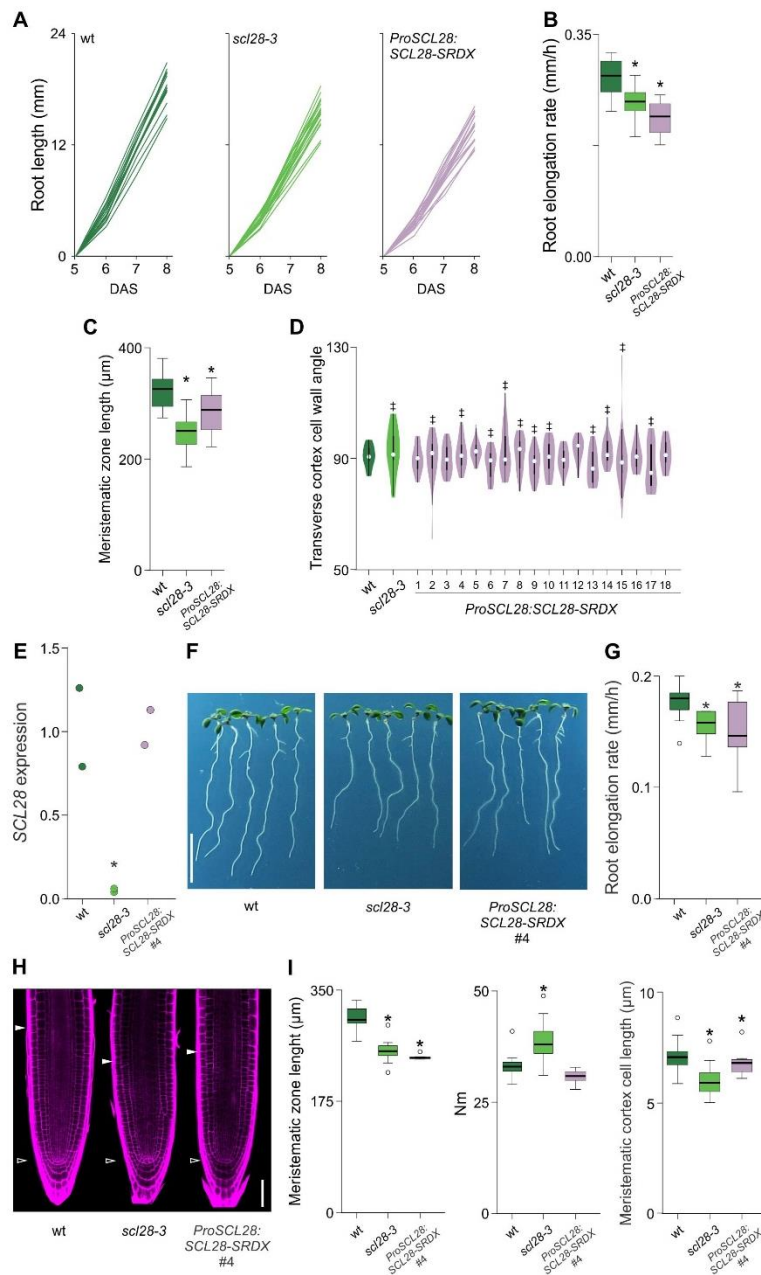

**Figure S5. A dominant repressor version of *SCL28* affects plant organ growth and meristem activity.**

**A.** Distribution of root growth phenotypes in wild-type, *scf28-3* and in a population of 18 primary transgenic plants transformed with *ProSCL28:SCL28-SRDX*.

**B.** Root elongation rates (mm/h) calculated for each plant from panel A is shown as boxplots. Asterisks indicate significant differences with wild-type (Student's t test,  $p < 0.05$ ).

**C.** Meristematic zone length (mm/h) of each plant from panel A is shown as boxplots. Asterisks indicate significant differences with wild-type (Student's t test,  $p < 0.05$ ).

**D.** Combined box and violin plot diagrams of the angles between the transverse cortex cell wall and the main longitudinal axis of the root of 6 days-after-sowing *ProSCL28:SCL28-SRDX*. The data shown are the measurements of 40 cell walls from each plant. † indicates significant differences in the variances (F test,  $p < 0.05$ ).

**E.** Expression of *SCL28* in wild-type, *sc128-3* and *ProSCL28:SCL28-SRDX #4*, a homozygous transgenic line selected for deeper characterization. Expression was estimated by RT-qPCR in 2 biological replicates and normalized to the mean value obtained in wild-type plants. Asterisks indicate significant differences from the wild-type (Student's t test,  $p < 0.05$ ).

**F.** Root phenotype in 10 days-old wild-type, *sc128-3* and *ProSCL28:SCL28-SRDX* plants. Scale bar = 1 cm.

**G.** Root elongation rate (mm/h) of wild-type, *sc128-3* and *ProSCL28:SCL28-SRDX #4* plants. Boxplots with the measurements of 15 different plants of each genotype are shown. Asterisks indicate significant differences with wild-type (Student's t test,  $p < 0.05$ ).

**H.** Root tip architecture in 6 days-after-sowing wild-type, *sc128-3* and *ProSCL28:SCL28-SRDX #4* plants examined by LSCM in PI (magenta) stained plants. The white arrowheads mark the position of the QC and the end of the meristem where cells start to elongate. Scale bar = 50  $\mu\text{m}$ .

**I.** Meristematic zone length, number of meristematic cortex cells (Nm) and length of meristematic cortex cells in the root meristem of wild-type, *sc128-3* and *ProSCL28:SCL28-SRDX #4* plants. Boxplots with the measurements of 15 roots of each genotype are shown. Asterisks indicate significant differences with wild-type plants (Student's t test,  $p < 0.05$ ).



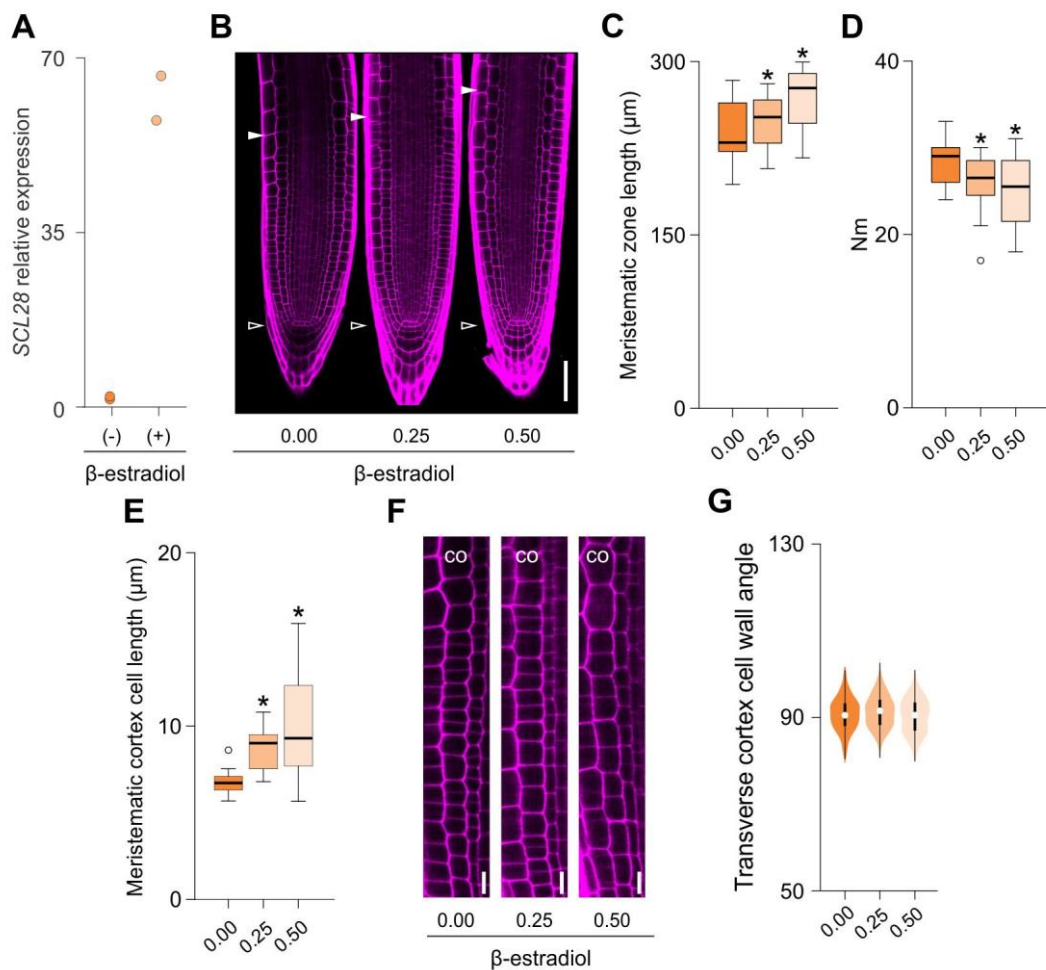

**Figure S6. Overexpression of *SCL28* in a  $\beta$ -estradiol inducible line causes phenotypes opposite as those found in *scl28-3*.**

**A.** Expression of *SCL28* in *XVE-SCL28* plants grown in media supplemented with 0.1  $\mu$ M  $\beta$ -estradiol. Expression was estimated by RT-qPCR in two biological replicates and normalized to the mean value obtained in mock-treated control plants.

**B.** Root tip architecture of 6 days-after-sowing *XVE-SCL28* plants grown in media supplemented with 0.25 or 0.50  $\mu$ M  $\beta$ -estradiol examined by LSCM in PI (magenta) stained plants. The white arrowheads mark the position of the QC and the end of the meristem where cells start to elongate. Scale bar = 50  $\mu$ m.

**C-E.** Meristematic zone length (C), number of meristematic cortex cells (Nm) (D) and length of meristematic cortex cells (E) in the root meristem of *XVE-SCL28* plants grown in media supplemented with 0.25 or 0.50  $\mu$ M  $\beta$ -estradiol. Boxplots with the measurements of 12 roots of each genotype are shown. Asterisks indicate significant differences with mock-treated plants (Student's t test,  $p < 0.05$ ).

**F.** Detailed view of a file of meristematic cortex cells in *XVE-SCL28* plants grown in media supplemented with 0.25 or 0.50  $\mu$ M  $\beta$ -estradiol. The label "co" indicates the file of meristematic cortex cells. Scale bar = 10  $\mu$ m.

**G.** Combined box and violin plot diagrams of the angles between the transverse cortex cell wall and the main longitudinal axis of the root of 6 days-after-sowing *XVE-SCL28* plants grown in media supplemented with 0.25 or 0.50  $\mu$ M  $\beta$ -estradiol. The data shown are the measurements of 20 cells in 12 different roots from each condition.



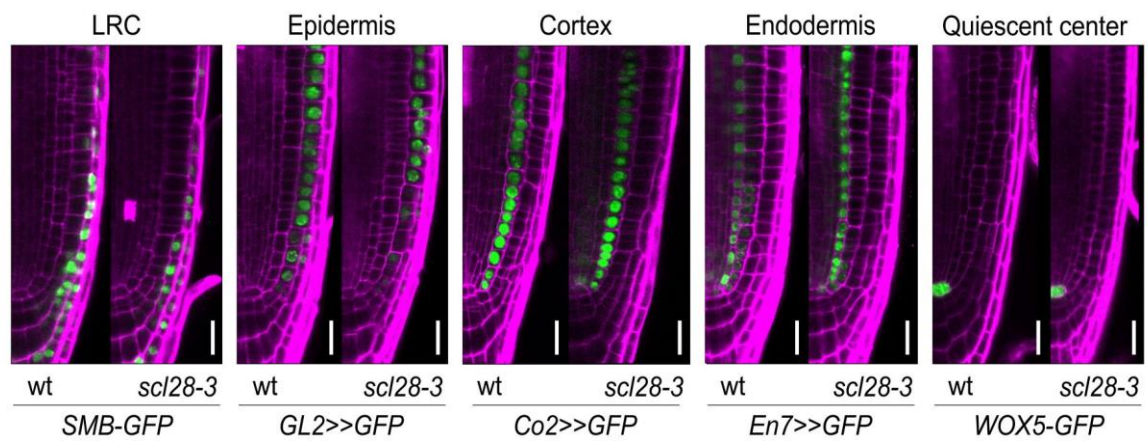

**Figure S7. Cell patterning in *scI28-3* root.**

Cell patterning in wild-type and *scI28-3* plants was evaluated by LSCM in PI (magenta) stained plants expressing reporters specific for lateral root cap (*SMB-GFP*), epidermis (*GL2>>GFP*), cortex (*Co2>>GFP*), endodermis (*En7>>GFP*) or the quiescent center (*WOX5-GFP*). In all cases, the fluorescence of the GFP reporter is shown in green.

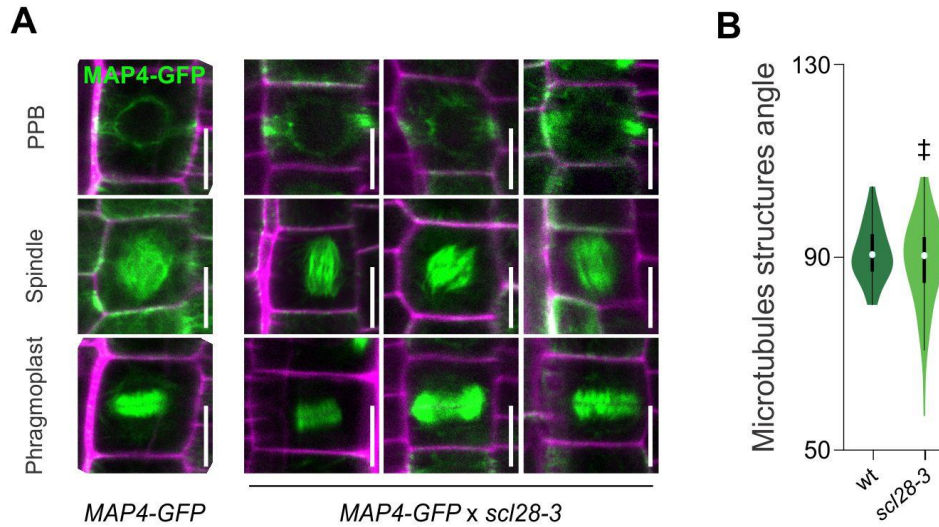

**Figure S8. SCL28 modulates cell division plane orientation and cell wall biogenesis.**

**A.** Microtubule arrays (pre-prophase band (PPB), mitotic spindle and phragmoplast) in meristematic cortex cells of wild-type and *scl28-3* plants. Microtubules are detected thanks to the *MAP4-GFP* reporter. Cell walls were stained with PI (magenta). Scale bar = 10  $\mu$ m.

**B.** Combined box and violin plot diagram of the angles between the microtubule arrays (pre-prophase band (PPB), mitotic spindle and phragmoplast) and the main longitudinal axis of the root. The data shown are the measurements of 20 cells in 15 different roots of each genotype. ‡ indicates significant differences in the variances (F-test,  $p < 0.05$ ).

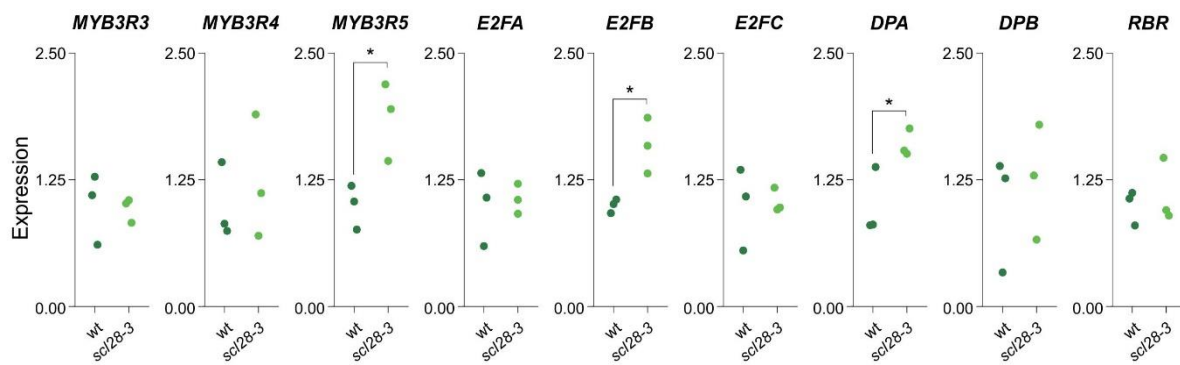

**Figure S9. Expression of cell cycle regulators in wild-type and *sci28-3* plants.**

Expression was estimated by RT-qPCR in three biological replicates and normalized to the mean value obtained in wild-type plants. Asterisks indicate significant differences (Student's t test,  $p < 0.05$ ).

## Supplementary Tables

Table S1. Mutants and reporter lines used in this study.

| Line                  | Line Description                               | Reference                                    |
|-----------------------|------------------------------------------------|----------------------------------------------|
| <i>scl28-3</i>        | Insertional mutant. SALK_205284                | This work                                    |
| <i>myb3r3-1</i>       | Insertional mutant. SALK_041111C               | Kobayashi <i>et al.</i> (2015) EMBO J.       |
| <i>myb3r4-1</i>       | Insertional mutant. SALK_059819C               | Haga <i>et al.</i> (2007) Development        |
| <i>CYCB1;1-GFP</i>    | Mitotic Cyclin <i>CYCB1;1</i> reporter         | Ubeda-Tomas <i>et al.</i> (2009) Curr Biol   |
| <i>SMB-GFP</i>        | Lateral Root Cap specific marker               | Fendrych <i>et al.</i> (2014) Curr Biol      |
| <i>GL2&gt;&gt;GFP</i> | Epidermis specific marker                      | Dietrich <i>et al.</i> (2017) Nature Plants  |
| <i>Co2&gt;&gt;GFP</i> | Cortex specific marker                         | Dietrich <i>et al.</i> (2017) Nature Plants  |
| <i>En7&gt;&gt;GFP</i> | Endodermis specific marker                     | Dietrich <i>et al.</i> (2017) Nature Plants  |
| <i>WOX5-GFP</i>       | Quiescent center specific marker               | Sarkar <i>et al.</i> (2007) Nature           |
| <i>TUA2-RFP</i>       | Alpha tubulin 2 RFP reporter                   | Van Damme <i>et al.</i> (2004) Plant Phys    |
| <i>MAP4-GFP</i>       | Microtubules reporter                          | Marck <i>et al.</i> (1998) The Plant Cell    |
| <i>XVE-SCL28</i>      | $\beta$ -estradiol <i>SCL28</i> inducible line | Coego <i>et al.</i> (2014) The plant Journal |

**Table S2. Binary plasmids generated in this study.**

| Vector      | Construct                        | Arabidopsis Chromosome: Start-End                                                    |
|-------------|----------------------------------|--------------------------------------------------------------------------------------|
| <b>CG11</b> | <i>ProSCL28:SCL28-VENUS</i>      | [ <i>ProSCL28:SCL28</i> , 1: 23402654 - 23399391] – <i>VENUS</i> CDS                 |
| <b>CG22</b> | <i>ProSCL28ΔMSA1:SCL28-VENUS</i> | [ <i>ProSCL28ΔMSE:SCL28</i> , 1:23402654 - 23399391] <sup>a</sup> – <i>VENUS</i> CDS |
| <b>CG18</b> | <i>ProSCL28:SCL28-SRDX</i>       | [ <i>ProSCL28:SCL28</i> , 1: 23402654 - 23399391] – SRDX <sup>b</sup>                |
| <b>CG07</b> | <i>Pro35S:SCL28</i>              | <i>Pro35S</i> : [ <i>SCL28</i> , Chr1:23401367 – 23399391]                           |

<sup>a</sup> Coordinates of the deleted MSA: Chromosome 1, nucleotides 23402262-2340225.

<sup>b</sup> SRDX: Transcriptional repressor motif LDLDLELRGFA (Hiratsu et al. (2003) The Plant Journal).

All constructs were cloned in the binary vector pCHF3 (Jarvis, P., Chen, L. J., Li, H., Peto, C. A., Fankhauser, C., and Chory, J. (1998). An Arabidopsis mutant defective in the plastid general protein import apparatus. *Science* 282, 100103). T-DNA constructs were introduced into *A. tumefaciens* strain ASE (Fraley, R. T., Rogers, S. G., Horsch, R. B., Eichholtz, D. A., Flick, J. S., Fink, C. L., Hoffmann, N. L., and Sanders, P. R. (1985) The SEV system: a new disarmed Ti plasmid vector system for plant transformation. *Biotechnology* 3, 629635).

**Table S3. Oligonucleotide primers used in this study.**

| Gene              | Locus ID  | Sequence                 | Purpose                      |
|-------------------|-----------|--------------------------|------------------------------|
| <b>SCL28</b>      | AT1G63100 | GATGAAGACAACGGCGGTGAAG   | RT-qPCR Forward primer       |
|                   |           | TTCCCTCCGGTAGTCCAAGC     | RT-qPCR Reverse primer       |
|                   |           | GAAAGGACCACCGGAAACATC    | Genotyping, Fwd <sup>a</sup> |
|                   |           | CCGTACATCCTAAGCAACATCT   | Genotyping, Rev <sup>a</sup> |
| <b>CYCB1;2</b>    | AT5G06150 | TCCCTCCATGCTTGCTGCTTC    | RT-qPCR Forward primer       |
|                   |           | CCTGCTCTCACCGCATCTC      | RT-qPCR Reverse primer       |
| <b>HISTONE H4</b> | AT2G28740 | ACCAAATTGCGTGTTCATTG     | RT-qPCR Forward primer       |
|                   |           | ATGTCTGGTCGTGAAAGGGAG    | RT-qPCR Reverse primer       |
| <b>MYB3R3</b>     | AT3G09370 | TGATCAAAAGGTGAATGATGGT   | RT-qPCR Forward primer       |
|                   |           | TTCATCATCAGCTTTCTCTCC    | RT-qPCR Reverse primer       |
| <b>MYB3R4</b>     | AT5G11510 | TGCCTGGAAGGTCCGATAATGGAA | RT-qPCR Forward primer       |
|                   |           | CTGATCCAAAAGGCCAGACGACAT | RT-qPCR Reverse primer       |
| <b>MYB3R5</b>     | AT5G02320 | TGGTAAGGACTTGCGCATGACAGA | RT-qPCR Forward primer       |
|                   |           | GGACCTTGGACTCAAGAGGAGGAT | RT-qPCR Reverse primer       |
| <b>E2FA</b>       | AT2G36010 | CAACCCAGAACTGCTATTGT     | RT-qPCR Forward primer       |
|                   |           | GTCCGACTCATTTTTCAAC      | RT-qPCR Reverse primer       |
| <b>E2FB</b>       | AT5G22220 | CCGATGAAAGAGGAAAGCACCG   | RT-qPCR Forward primer       |
|                   |           | CGCCTACCTCTGATCGAAACC    | RT-qPCR Reverse primer       |
| <b>E2FC</b>       | AT1G47870 | TGCCGTTATGACAGTTCTTTAGGG | RT-qPCR Forward primer       |
|                   |           | AGTGTTCATCCTCAGCTTCCT    | RT-qPCR Reverse primer       |
| <b>DPA</b>        | AT5G02470 | CTCGACTTCAATAGCACACCTTT  | RT-qPCR Forward primer       |
|                   |           | TGAGCGGAGCTATGTTGAGA     | RT-qPCR Reverse primer       |
| <b>DPB</b>        | AT5G03415 | TTTGATTTCAACAGCACTCCA    | RT-qPCR Forward primer       |
|                   |           | GCGTGAAATTGTGACAAAC      | RT-qPCR Reverse primer       |
| <b>RBR</b>        | AT3G12280 | GATCAAAGATGGATGCTC       | RT-qPCR Forward primer       |
|                   |           | TACAGATGCTATAACTGAAGA    | RT-qPCR Reverse primer       |
| <b>RPS26C</b>     | AT3G56340 | GACTTTCAAGCGCAGGAATGGTG  | RT-qPCR Forward primer       |
|                   |           | CCTTGTCCTTGGGGCAACTTT    | RT-qPCR Reverse primer       |
| <b>PP2A</b>       | AT1G13320 | CCTGCGGTAATAACTGCATCT    | RT-qPCR Forward primer       |
|                   |           | CTTCACTTAGCTCCACCAAGCA   | RT-qPCR Reverse primer       |

<sup>a</sup> To genotype for the T-DNA insertions, the Lb1 primer (GCGTGGACCGCTTGCTGCAACT) was used.

## **Supplementary Datasets (Separated files)**

**Dataset 1. Expression of CDKs and CYC in G2/M cells.**

**Dataset 2. Expression of Mitosis Specific Genes (MSG) in G2/M cells.**

**Dataset 3. Differentially expressed genes in G2/M cells when compared to whole meristems.**

**Dataset 4. Differentially expressed genes in G2/M cells when compared to whole meristems with expression enriched in the root meristem.**

**Dataset 5. Transcription factors enriched in G2/M cells.**
